# Supplementary material for: Ruthenium(iii)-bis(phenolato)bipyridine/TiO2 hybrids: unprecedented photocatalytic hydrogen evolution
Source: Royal Society of Chemistry journal article supplement (doi:10.1039/c9dt01506j), 2019-01-01
Supplement: c9dt01506j1.pdf [file c9dt01506j1.pdf]

## Electronic Supporting Information

### Ruthenium(III)-bis(phenolato)bipyridine/TiO<sub>2</sub> hybrids : unprecedented photocatalytic hydrogen evolution

Binitendra Naath Mongal,<sup>\*†</sup> Amritanjali Tiwari,<sup>‡,§</sup> Malapaka Chandrasekharam,<sup>†,§</sup> and Ujjwal Pal<sup>\*‡,§</sup>

<sup>†</sup>Polymer & Functional Materials Division, CSIR-Indian Institute of Chemical Technology, Hyderabad, India

<sup>‡</sup>Centre for Environmental Engineering and Fossil Fuels, CSIR-Indian Institute of Chemical Technology, Hyderabad, India

<sup>§</sup>Academy of Scientific and Innovative Research (AcSIR), New Delhi, India

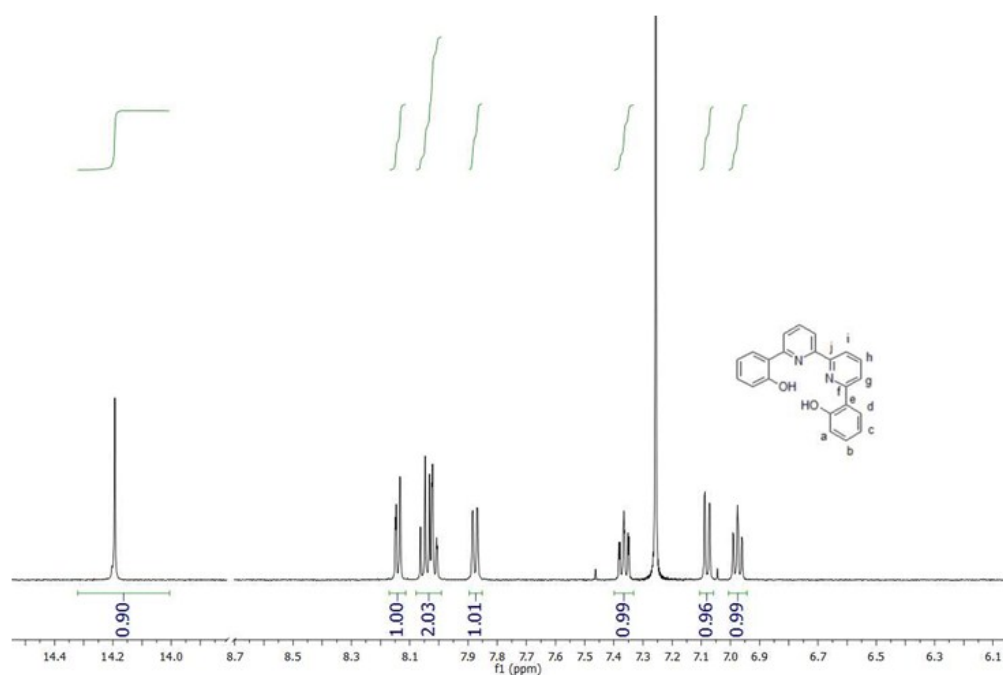

**Figure S1.** NMR spectra of the ligand H<sub>2</sub>L.

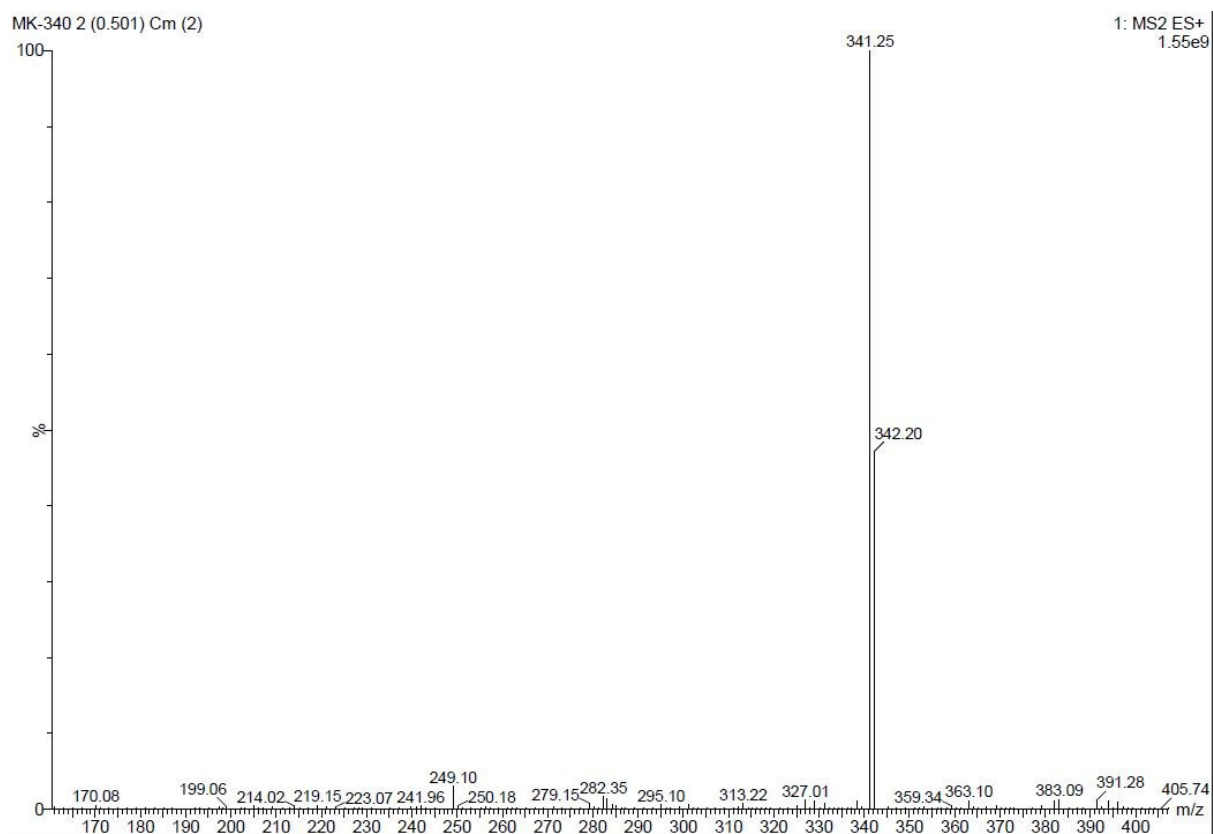

**Figure S2.** ESI Mass Spectrum of the ligand H<sub>2</sub>L.

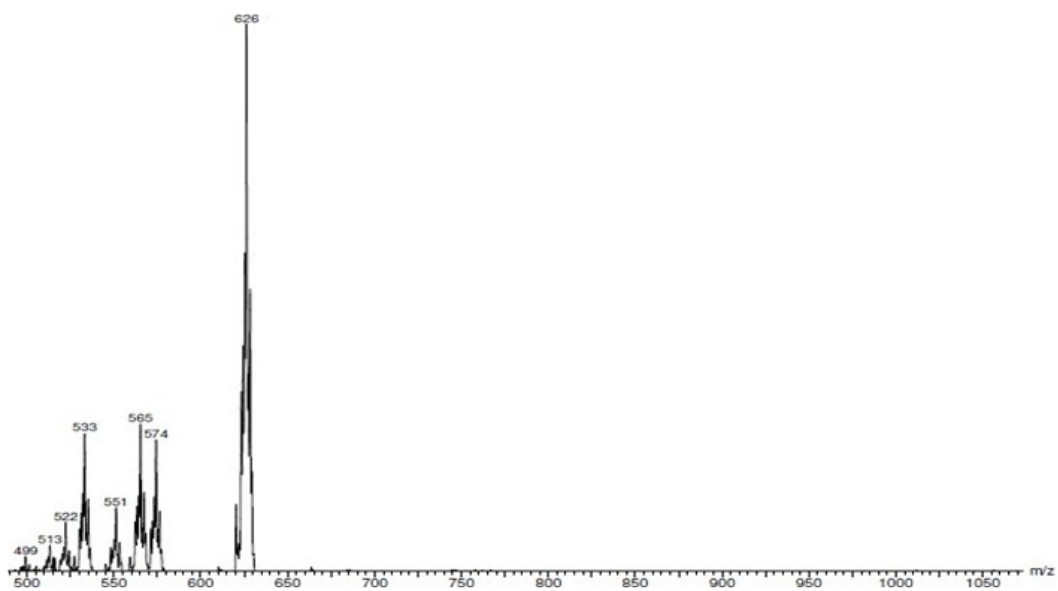

**Figure S3.** ESI Mass Spectrum of MCS-B4M

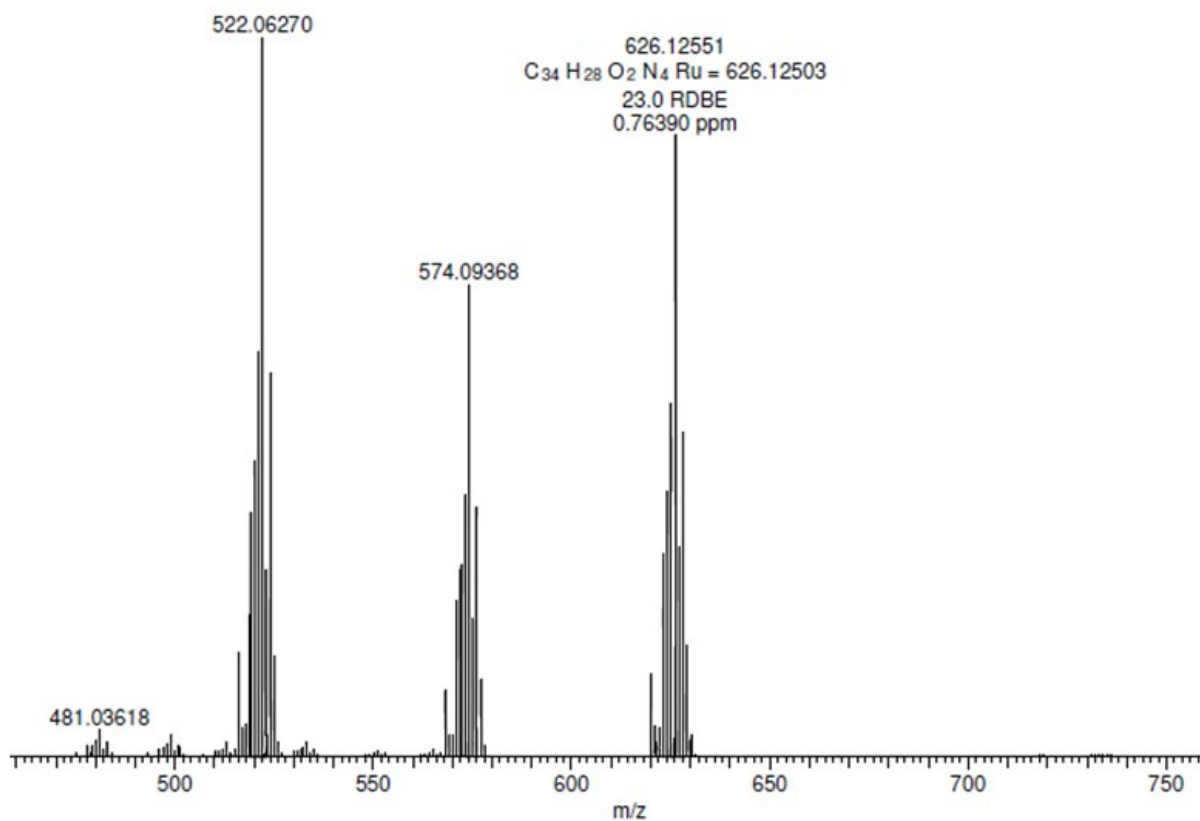

**Figure S4.** High resolution Mass spectrum of MCS-B4M

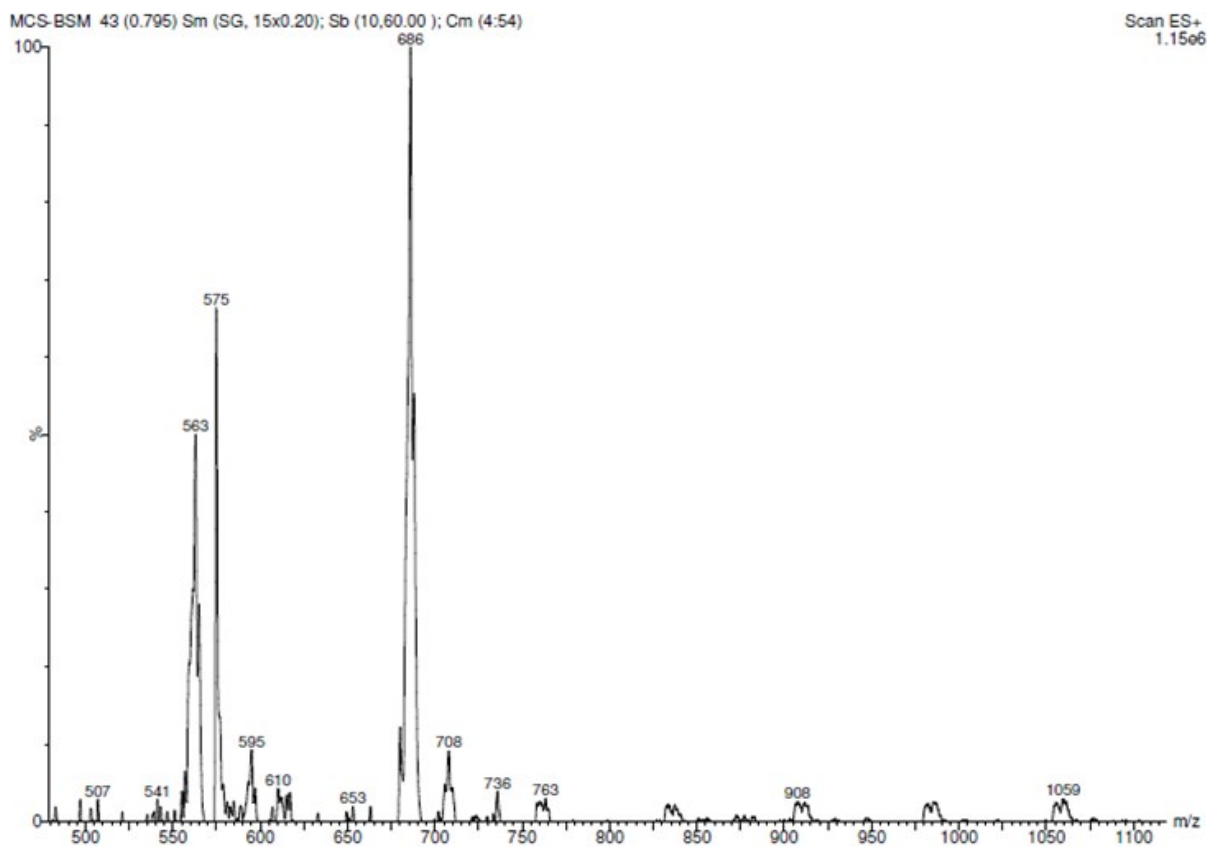

**Figure S5.** ESI Mass spectrum of MCS-B5M

MCS-B5M #3-20 RT: 0.02-0.15 AV: 18 NL: 7.49E6  
T: FTMS (1,1) + p ESI Full ms [75.00-1500.00]

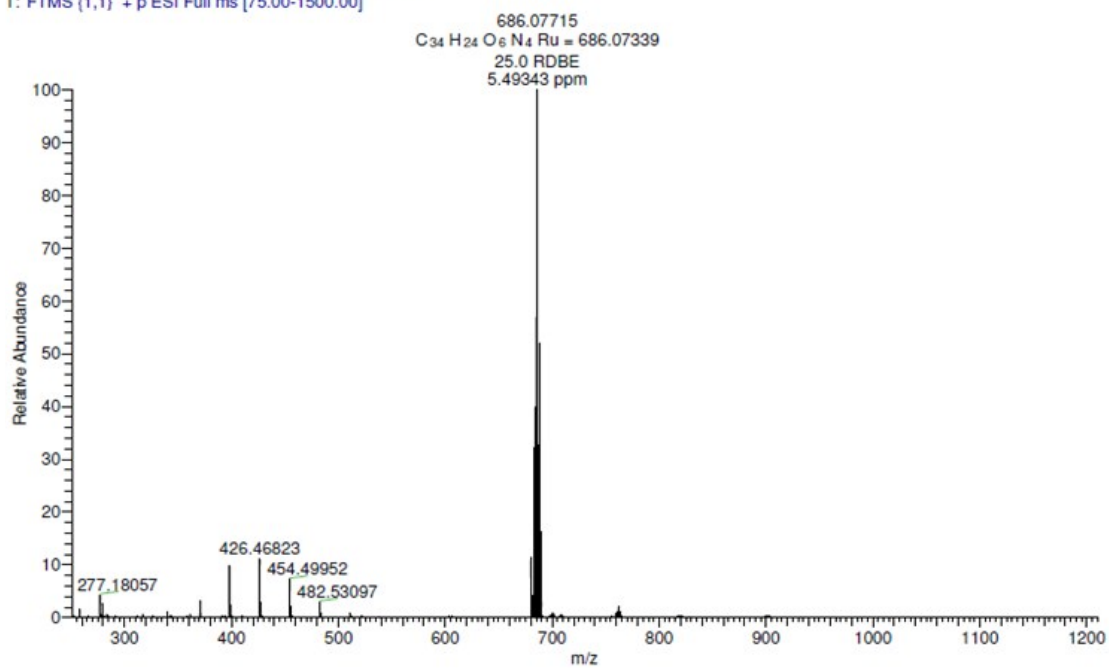

**Figure S6.** High resolution Mass Spectrum of MCS-B5M

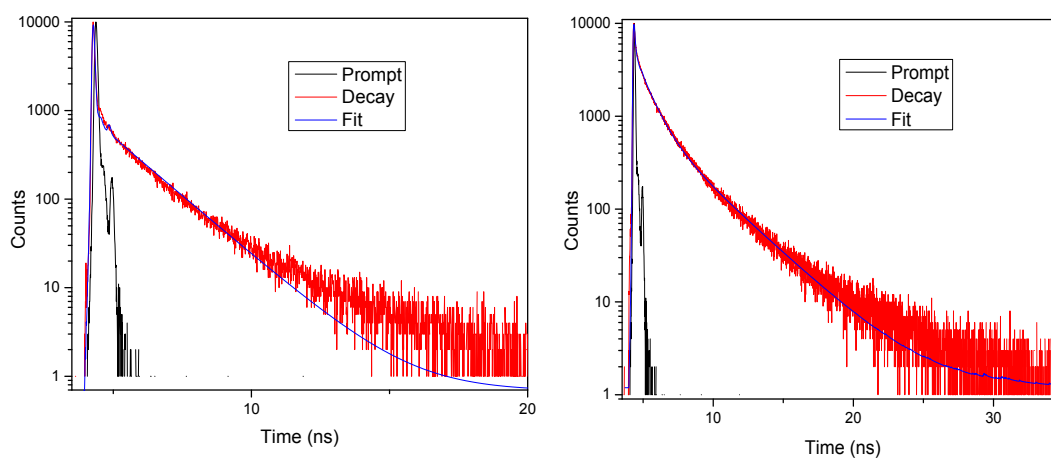

**Figure S7.** Excited state lifetime decay profile of MCS-B4M (left) and MCS-B5M (right).

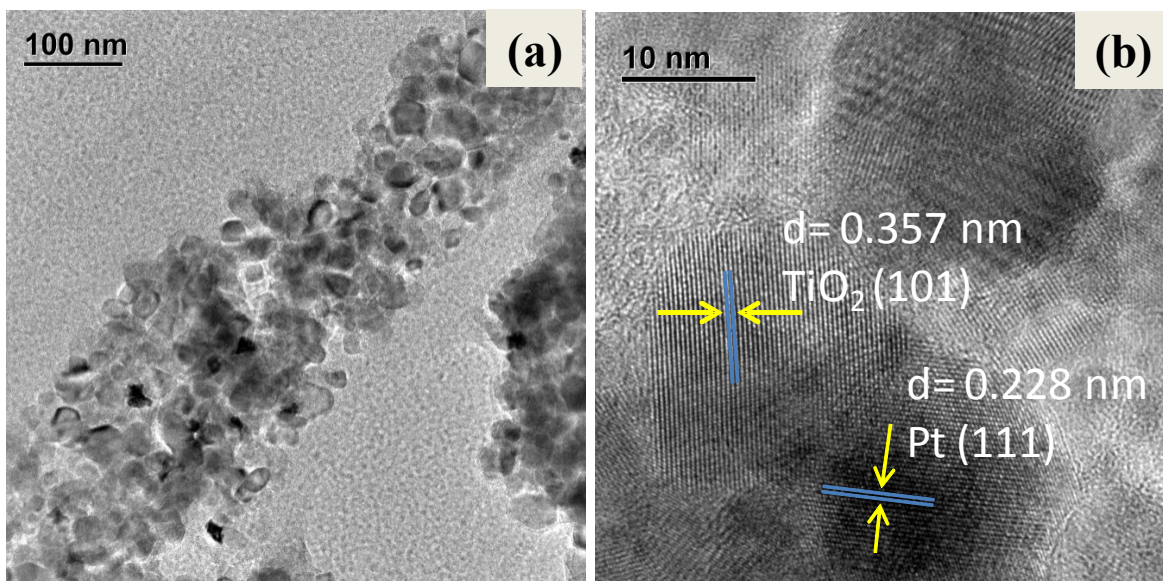

**Figure S8.** TEM images Pt-TiO<sub>2</sub> (a) low and (b) high magnification

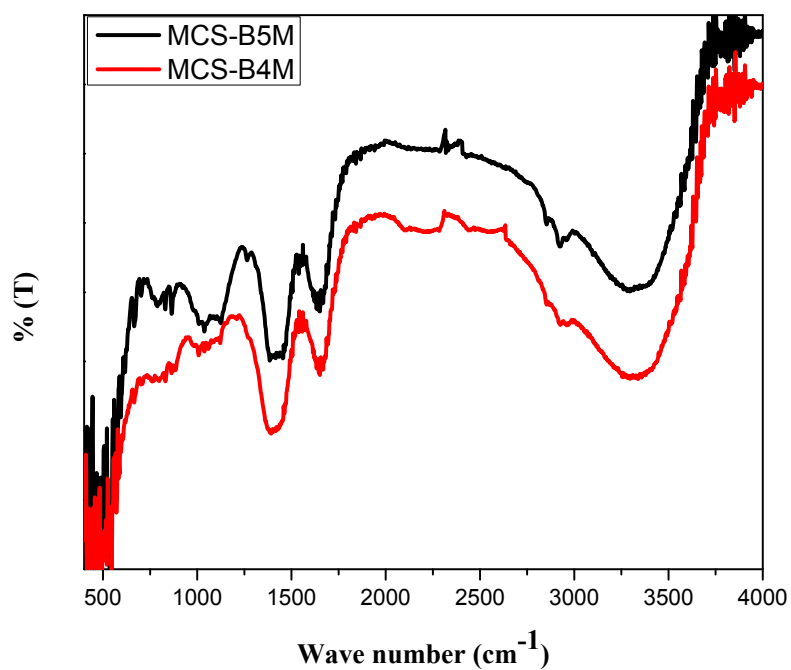

**Figure S9.** FT-IR spectra of MCS-B4M (red) and MCS-B5M (black).

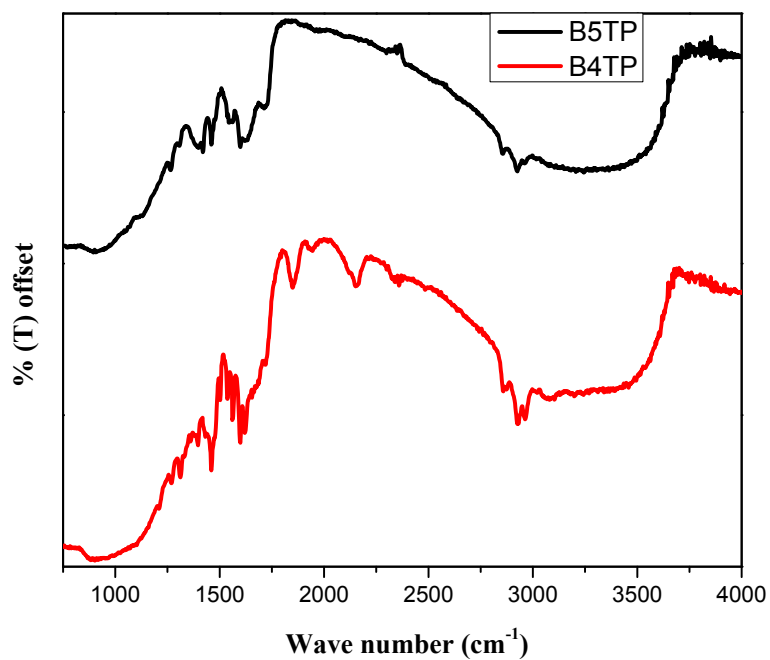

**Figure S10.** FT-IR spectra of B4TP (red) and B5TP (black).

**Table S1. Photocatalytic activity and average TON of prepared photocatalyst**

| Photocatalyst | H <sub>2</sub> O + TEOA solution | H <sub>2</sub> Yield (μmol) | TON    | TON (average) |
|---------------|----------------------------------|-----------------------------|--------|---------------|
| <b>B5TP</b>   | 9:1                              | 21239                       | 84,956 | 84,600        |
|               |                                  | 21149                       | 84,596 |               |
|               |                                  | 21062                       | 84,250 |               |
| <b>B4TP</b>   | 9:1                              | 15467                       | 61,868 | 61,482        |
|               |                                  | 15363                       | 61,452 |               |
|               |                                  | 15282                       | 61,128 |               |
| <b>N719TP</b> | 9:1                              | 5336                        | 21,344 | 21,152        |
|               |                                  | 5276                        | 21,104 |               |
|               |                                  | 5252                        | 21,010 |               |

## Apparent quantum efficiency:<sup>1,2</sup>

The apparent quantum efficiency was measured by the following equation:

$$\eta_{\text{photons}} = \frac{P\lambda}{hc} \times t$$

Where,

|                         |   |                   |
|-------------------------|---|-------------------|
| $\eta_{\text{photons}}$ | = | No. of photons    |
| P                       | = | Power of light    |
| $\lambda$               | = | Wavelength        |
| t                       | = | Time              |
| h                       | = | Planck's constant |
| c                       | = | Velocity of light |

In the study, we use 300 W Xe lamp with  $\geq 420$  nm band-pass filter and the incident photon number is determined by optical power/energy meter (Newport, model: 842-PE). The average incident irradiation is determined to be 0.16 W/cm<sup>2</sup> by Newport (Oriel instrument solar simulator, USA model) and area was 7.4 cm<sup>2</sup> for a photo reacted solution mixture. The amount of hydrogen gas produced in 5 h for B4TP, B5TP and N719TP was 15467, 21239 and 5336  $\mu\text{mol}$ , respectively. Here, we calculate the quantum efficiency at  $\lambda \geq 420$  for B4TP, B5TP and N719TP and the calculations are given below.

Number of incident photons ( $\eta$ ) in 5 h over 7.4 cm<sup>2</sup> area of irradiated zone in the photoreactor:

$$= \frac{0.16 \text{ J.s}^{-1}.\text{cm}^{-2} \times 7.4 \text{ cm}^2 \times 5 \times 3600 \text{ s} \times 420 \times 10^{-9} \text{ m}}{6.626 \times 10^{-34} \text{ J.s} \times 3 \times 10^8 \text{ m.s}^{-1}} = 4.5 \times 10^{22}$$

Therefore, incident photon =  $4.5 \times 10^{22}$

$$\text{QE} = 2 \times \frac{\text{Number of evolved H}_2 \text{ molecule}}{\text{Number of incident photon}} \times 100\%$$

$$\text{QE}_{\text{B4TP}} = 2 \times \frac{15467 \times 10^{-6} \times 6.023 \times 10^{23}}{4.5 \times 10^{22}} \times 100\% = 41.4 \%$$

$$\text{QE}_{\text{B5TP}} = 2 \times \frac{21239 \times 10^{-6} \times 6.023 \times 10^{23}}{4.5 \times 10^{22}} \times 100\% = 57.2 \%$$

$$\text{QE}_{\text{N719TP}} = 2 \times \frac{5336 \times 10^{-6} \times 6.023 \times 10^{23}}{4.5 \times 10^{22}} \times 100\% = 14.2 \%$$

### DFT Optimised parameters for MCS-B4M

|    |             |             |             |
|----|-------------|-------------|-------------|
| Ru | -0.00790260 | 0.07225629  | -0.17695070 |
| C  | 2.64777829  | 0.36780466  | 1.16230703  |
| C  | 0.69763792  | 0.62610969  | 2.49643466  |
| C  | 3.41209843  | 0.79328911  | 2.27020793  |
| C  | 1.44048316  | 0.97853592  | 3.61897944  |
| C  | 2.82124353  | 1.08641441  | 3.48801419  |
| H  | 4.48771048  | 0.91496986  | 2.16169971  |
| H  | 0.95039312  | 1.19226590  | 4.56814541  |
| H  | 3.43462063  | 1.40878549  | 4.33214367  |
| C  | -0.77341300 | 0.53627612  | 2.49692356  |
| C  | -2.67968219 | 0.04790585  | 1.16319963  |
| C  | -1.55204939 | 0.79257006  | 3.62124005  |
| C  | -3.48826334 | 0.37445894  | 2.27346566  |
| C  | -2.93582915 | 0.73233580  | 3.49186566  |
| H  | -1.09034634 | 1.06061299  | 4.57085325  |
| H  | -4.57087436 | 0.36550949  | 2.16723361  |
| H  | -3.58284107 | 0.97444449  | 4.33771598  |
| N  | 1.29054011  | 0.35650233  | 1.29739188  |
| N  | -1.33071957 | 0.19936514  | 1.29750759  |
| O  | -1.40279977 | -0.17900460 | -1.62652575 |
| O  | 1.40755409  | -0.00771906 | -1.62716790 |
| C  | 3.30605682  | -0.03846464 | -0.08987470 |
| C  | 2.66657732  | -0.14523054 | -1.37987088 |
| C  | 4.69315034  | -0.33614952 | -0.02763006 |



|   |             |             |             |
|---|-------------|-------------|-------------|
| C | 3.50069991  | -0.43010352 | -2.50440225 |
| C | 5.46138227  | -0.65021072 | -1.12901342 |
| H | 5.18411620  | -0.35340987 | 0.94648167  |
| C | 4.84890187  | -0.67473300 | -2.39383287 |
| H | 2.99312721  | -0.46559509 | -3.47097042 |
| H | 6.52135255  | -0.88436849 | -1.01227930 |
| H | 5.43583777  | -0.90535544 | -3.28757394 |
| C | -3.28604077 | -0.42927657 | -0.09020592 |
| C | -2.63746839 | -0.46179592 | -1.37962865 |
| C | -4.62967340 | -0.88493131 | -0.02958985 |
| C | -3.43186385 | -0.84231968 | -2.50471615 |
| C | -5.35583188 | -1.28501847 | -1.13146080 |
| H | -5.11640451 | -0.95904330 | 0.94383255  |
| C | -4.74320946 | -1.23995428 | -2.39555723 |
| H | -2.92253540 | -0.81980343 | -3.47074285 |
| H | -6.38200621 | -1.63926948 | -1.01554888 |
| H | -5.29860200 | -1.53717300 | -3.28978877 |
| C | -0.14441466 | 2.45041831  | -1.88475425 |
| C | -0.20588997 | 3.08295857  | 0.32637883  |
| C | -0.22625470 | 3.77150448  | -2.29920323 |
| H | -0.08680070 | 1.62067247  | -2.59019073 |
| C | -0.28938203 | 4.42565197  | -0.01525493 |
| H | -0.20034148 | 2.77961371  | 1.37514535  |
| C | -0.29915223 | 4.80609765  | -1.36053512 |
| H | -0.23491730 | 3.98857010  | -3.36991612 |

|   |             |             |             |
|---|-------------|-------------|-------------|
| H | -0.34955348 | 5.17391533  | 0.77837568  |
| C | 0.15563980  | -2.66486820 | -1.21400828 |
| C | 0.17856475  | -2.67614158 | 1.08858578  |
| C | 0.24572511  | -4.04838837 | -1.25488042 |
| H | 0.10376836  | -2.05367789 | -2.11660057 |
| C | 0.26949899  | -4.05967471 | 1.12267590  |
| H | 0.14819427  | -2.09472820 | 2.01252773  |
| C | 0.30786473  | -4.78928175 | -0.07035419 |
| H | 0.26483346  | -4.54752266 | -2.22641972 |
| H | 0.30837631  | -4.56669463 | 2.08951870  |
| N | -0.13258232 | 2.10289611  | -0.58498501 |
| N | 0.12261964  | -1.97991893 | -0.05702286 |
| C | -0.35923786 | 6.24372871  | -1.77730006 |
| H | -0.76101733 | 6.88140396  | -0.97740629 |
| H | 0.64870085  | 6.61684132  | -2.02462004 |
| H | -0.98258142 | 6.37548998  | -2.67383593 |
| C | 0.43667358  | -6.28169871 | -0.08058194 |
| H | 1.49391330  | -6.57727976 | -0.18790249 |
| H | 0.06323229  | -6.72689849 | 0.85246089  |
| H | -0.11260375 | -6.72658770 | -0.92293809 |

1 18 1.0 19 1.0 20 1.0 21 1.0 60 1.0 61 1.0

2 4 1.5 18 1.5 22 1.0

3 5 1.5 10 1.0 18 1.5

4 6 1.5 7 1.0

5 6 1.5 8 1.0

6 9 1.0

7

8

9

10 12 1.5 19 1.5

11 13 1.5 19 1.5 32 1.0

12 14 1.5 15 1.0

13 14 1.5 16 1.0

14 17 1.0

15

16

17

18

19

20 33 1.0

21 23 1.0

22 23 1.5 24 1.5

23 25 1.5

24 26 1.5 27 1.0

25 28 1.5 29 1.0

26 28 1.5 30 1.0

27

28 31 1.0

29

30

31

32 33 1.5 34 1.5

33 35 1.5

34 36 1.5 37 1.0

35 38 1.5 39 1.0

36 38 1.5 40 1.0

37

38 41 1.0

39

40

41

42 44 1.5 45 1.0 60 1.5

43 46 1.5 47 1.0 60 1.5

44 48 1.5 49 1.0

45

46 48 1.5 50 1.0

47

48 62 1.0

49

50

51 53 1.5 54 1.0 61 1.5

52 55 1.5 56 1.0 61 1.5

53 57 1.5 58 1.0

54

55 57 1.5 59 1.0

56

57 66 1.0

58

59

60

61

62 63 1.0 64 1.0 65 1.0

63

64

65

66 67 1.0 68 1.0 69 1.0

67

68

69

### **DFT Optimised parameters for MCS-B5M**

|    |             |             |             |
|----|-------------|-------------|-------------|
| Ru | -0.08361200 | -0.00001000 | -0.08387300 |
| C  | -0.10329400 | 2.66987200  | 1.26501000  |
| C  | -0.35873500 | 0.73723300  | 2.62614000  |
| C  | -0.37663700 | 3.45762900  | 2.40537700  |
| C  | -0.56002200 | 1.49802600  | 3.77284800  |
| C  | -0.59257400 | 2.88348400  | 3.64588300  |
| H  | -0.43978700 | 4.53897600  | 2.30641700  |
| H  | -0.71501000 | 1.02171300  | 4.74010700  |

|   |             |             |             |
|---|-------------|-------------|-------------|
| H | -0.79624100 | 3.51414900  | 4.51383700  |
| C | -0.35891500 | -0.73751400 | 2.62604300  |
| C | -0.10350800 | -2.66998800 | 1.26470900  |
| C | -0.56079200 | -1.49846500 | 3.77255500  |
| C | -0.37749100 | -3.45789600 | 2.40480600  |
| C | -0.59373200 | -2.88389100 | 3.64533400  |
| H | -0.71600000 | -1.02229000 | 4.73984900  |
| H | -0.44088500 | -4.53921000 | 2.30557100  |
| H | -0.79794900 | -3.51463600 | 4.51310200  |
| N | -0.16256000 | 1.31558800  | 1.40635300  |
| N | -0.16258200 | -1.31572400 | 1.40622900  |
| O | -0.04111100 | -1.40569800 | -1.53999000 |
| O | -0.04131700 | 1.40575500  | -1.53984800 |
| C | 0.22538100  | 3.30288300  | -0.02195600 |
| C | 0.18817900  | 2.65711600  | -1.31161200 |
| C | 0.59960300  | 4.67298600  | 0.00520200  |
| C | 0.42416800  | 3.46947700  | -2.46191600 |
| C | 0.86041700  | 5.41943500  | -1.12393900 |
| H | 0.72502700  | 5.16585900  | 0.96997300  |
| C | 0.74809700  | 4.80301700  | -2.38185100 |
| H | 0.35234800  | 2.95805900  | -3.42433000 |
| H | 1.15866600  | 6.46579100  | -1.03499000 |
| H | 0.93491300  | 5.37399400  | -3.29572300 |
| C | 0.22577700  | -3.30282800 | -0.02216500 |
| C | 0.18880400  | -2.65699800 | -1.31178200 |

|   |             |             |             |
|---|-------------|-------------|-------------|
| C | 0.60042700  | -4.67279800 | 0.00513600  |
| C | 0.42577800  | -3.46917200 | -2.46200500 |
| C | 0.86201300  | -5.41909800 | -1.12393300 |
| H | 0.72558300  | -5.16561300 | 0.96998100  |
| C | 0.75014400  | -4.80261000 | -2.38184800 |
| H | 0.35428000  | -2.95773200 | -3.42443200 |
| H | 1.16055700  | -6.46536400 | -1.03491900 |
| H | 0.93764500  | -5.37345500 | -3.29566300 |
| C | -2.58335500 | -0.00034700 | -1.58488000 |
| C | -3.03391600 | 0.00005100  | 0.68333000  |
| C | -3.93674000 | -0.00038900 | -1.89232300 |
| H | -1.81012100 | -0.00050800 | -2.35340600 |
| C | -4.40080300 | 0.00002200  | 0.45971000  |
| H | -2.63842300 | 0.00022600  | 1.70025400  |
| C | -4.87130500 | -0.00019100 | -0.85515300 |
| H | -4.25859600 | -0.00057700 | -2.93399300 |
| H | -5.10849000 | 0.00017000  | 1.29010700  |
| C | 2.54117600  | 0.00034200  | -1.34904700 |
| C | 2.75242900  | -0.00007000 | 0.95653300  |
| C | 3.91862100  | 0.00037200  | -1.51351100 |
| H | 1.84926900  | 0.00051900  | -2.19257400 |
| C | 4.13410500  | -0.00003300 | 0.87513400  |
| H | 2.24777200  | -0.00025000 | 1.92424600  |
| C | 4.73959200  | 0.00018000  | -0.38412200 |
| H | 4.34756700  | 0.00054400  | -2.51576500 |

|   |             |             |             |
|---|-------------|-------------|-------------|
| H | 4.75198100  | -0.00017900 | 1.77434600  |
| N | -2.13418100 | -0.00013100 | -0.31546900 |
| N | 1.96189100  | 0.00012100  | -0.13282500 |
| C | -6.34108200 | -0.00022800 | -1.08599400 |
| O | -7.16358600 | -0.00009900 | -0.20570100 |
| O | -6.66337200 | -0.00054600 | -2.38413700 |
| H | -7.63155600 | -0.00054400 | -2.42866300 |
| C | 6.22469900  | 0.00026500  | -0.46119100 |
| O | 6.95214900  | 0.00007200  | 0.49928300  |
| O | 6.67997200  | 0.00073600  | -1.71927800 |
| H | 7.64746000  | 0.00081600  | -1.66271600 |

1 18 1.0 19 1.0 61 1.0

2 4 1.5 18 1.5 22 1.0

3 5 1.5 10 1.0 18 1.5

4 6 2.0 7 1.0

5 6 1.5 8 1.0

6 9 1.0

7

8

9

10 12 1.5 19 1.5

11 13 1.5 19 1.5 32 1.0

12 14 1.5 15 1.0

13 14 2.0 16 1.0



14 17 1.0

15

16

17

18

19

20 33 1.5

21 23 1.5

22 23 1.5 24 1.5

23 25 1.5

24 26 2.0 27 1.0

25 28 2.0 29 1.0

26 28 1.5 30 1.0

27

28 31 1.0

29

30

31

32 33 1.5 34 1.5

33 35 1.5

34 36 2.0 37 1.0

35 38 2.0 39 1.0

36 38 1.5 40 1.0

37

38 41 1.0

39

40

41

42 44 1.5 45 1.0 60 1.5

43 46 2.0 47 1.0 60 1.5

44 48 1.5 49 1.0

45

46 48 1.5 50 1.0

47

48 62 1.0

49

50

51 53 1.5 54 1.0 61 1.5

52 55 2.0 56 1.0 61 1.5

53 57 1.5 58 1.0

54

55 57 1.5 59 1.0

56

57 66 1.0

58

59

60

61

62 63 2.0 64 1.5

63

64 65 1.0

65

66 67 2.0 68 1.5

67

68 69 1.0

69

## References

1. A. Tiwari, N. V. Krishna, L. Giribabu, and U. Pal, *J. Phys. Chem. C*, 2018, 122, 1, 495-502.
2. F. Raziq, Y. Qu, X. Zhang, M. Humayun, J. Wu, A. Zada, H. Yu, X. Sun and L. Jing, *J. Phys. Chem. C*, 2016, 120, 1, 98-107.
